# Supplementary material for: Provider beliefs in effectiveness and recommendations for primary HPV testing in 3 health-care systems
Source: PubMed Central journal article supplement (PMC9825247; doi:10.1093/jncics/pkac086), 2022-12-05
Supplement: pkac086_supplementary_data.pdf [file pkac086_supplementary_data.pdf]

Supplementary Methods

**A1.** Screening tests are those done in the absence of any symptoms or signs of disease. How **effective** do you believe the following screening tests are in reducing **deaths from cervical cancer**?

|                                                                                                       | Not Very Effective (<20% reduction) | Somewhat effective (20 to 50% reduction) | Very Effective (>50% reduction) | Effectiveness not known  | I am not sure            |
|-------------------------------------------------------------------------------------------------------|-------------------------------------|------------------------------------------|---------------------------------|--------------------------|--------------------------|
| <b>Pap test alone (with reflex HPV test for ASC-US results) for age:</b>                              |                                     |                                          |                                 |                          |                          |
| <21 years                                                                                             | <input type="checkbox"/>            | <input type="checkbox"/>                 | <input type="checkbox"/>        | <input type="checkbox"/> | <input type="checkbox"/> |
| 21-29 years                                                                                           | <input type="checkbox"/>            | <input type="checkbox"/>                 | <input type="checkbox"/>        | <input type="checkbox"/> | <input type="checkbox"/> |
| 30-64 years                                                                                           | <input type="checkbox"/>            | <input type="checkbox"/>                 | <input type="checkbox"/>        | <input type="checkbox"/> | <input type="checkbox"/> |
| 65+ years                                                                                             | <input type="checkbox"/>            | <input type="checkbox"/>                 | <input type="checkbox"/>        | <input type="checkbox"/> | <input type="checkbox"/> |
| <b>Pap and HPV co-testing for age:</b>                                                                |                                     |                                          |                                 |                          |                          |
| <21 years                                                                                             | <input type="checkbox"/>            | <input type="checkbox"/>                 | <input type="checkbox"/>        | <input type="checkbox"/> | <input type="checkbox"/> |
| 21-29 years                                                                                           | <input type="checkbox"/>            | <input type="checkbox"/>                 | <input type="checkbox"/>        | <input type="checkbox"/> | <input type="checkbox"/> |
| 30-64 years                                                                                           | <input type="checkbox"/>            | <input type="checkbox"/>                 | <input type="checkbox"/>        | <input type="checkbox"/> | <input type="checkbox"/> |
| 65+ years                                                                                             | <input type="checkbox"/>            | <input type="checkbox"/>                 | <input type="checkbox"/>        | <input type="checkbox"/> | <input type="checkbox"/> |
| <b>Primary HPV testing (i.e., clinician-performed HPV testing with a reflex Pap if HPV+) for age:</b> |                                     |                                          |                                 |                          |                          |
| <21 years                                                                                             | <input type="checkbox"/>            | <input type="checkbox"/>                 | <input type="checkbox"/>        | <input type="checkbox"/> | <input type="checkbox"/> |
| 21-29 years                                                                                           | <input type="checkbox"/>            | <input type="checkbox"/>                 | <input type="checkbox"/>        | <input type="checkbox"/> | <input type="checkbox"/> |
| 30-64 years                                                                                           | <input type="checkbox"/>            | <input type="checkbox"/>                 | <input type="checkbox"/>        | <input type="checkbox"/> | <input type="checkbox"/> |
| 65+ years                                                                                             | <input type="checkbox"/>            | <input type="checkbox"/>                 | <input type="checkbox"/>        | <input type="checkbox"/> | <input type="checkbox"/> |

**A2.** A unique aspect of cervical cancer prevention is that we have a vaccine to prevent infection with high-risk HPV types. How effective do you believe **HPV vaccination** is in reducing **new cases** of cervical cancer? *(Select one answer for each age group.)*

|                                                         | Not Very Effective<br>(<20% reduction) | Somewhat Effective<br>(20-50% reduction) | Very Effective<br>(>50% reduction) | Effectiveness not known  | I am not sure            |
|---------------------------------------------------------|----------------------------------------|------------------------------------------|------------------------------------|--------------------------|--------------------------|
| If vaccine is administered to the following age groups: |                                        |                                          |                                    |                          |                          |
| ≤ 14 years                                              | <input type="checkbox"/>               | <input type="checkbox"/>                 | <input type="checkbox"/>           | <input type="checkbox"/> | <input type="checkbox"/> |
| 15-26 years                                             | <input type="checkbox"/>               | <input type="checkbox"/>                 | <input type="checkbox"/>           | <input type="checkbox"/> | <input type="checkbox"/> |
| 27-45 years                                             | <input type="checkbox"/>               | <input type="checkbox"/>                 | <input type="checkbox"/>           | <input type="checkbox"/> | <input type="checkbox"/> |
| 46-64 years                                             | <input type="checkbox"/>               | <input type="checkbox"/>                 | <input type="checkbox"/>           | <input type="checkbox"/> | <input type="checkbox"/> |
| 65+ years                                               | <input type="checkbox"/>               | <input type="checkbox"/>                 | <input type="checkbox"/>           | <input type="checkbox"/> | <input type="checkbox"/> |

**B1.** During a typical week, approximately how many female patients do you see?

- 25 or fewer
- 26-50
- 51-75
- 76-100
- 101-125
- More than 125

**B2.** In the past month, have you personally performed a Pap test, Pap and HPV co-test, or primary HPV test?

- Yes
- No



**B6. Among women in each age group, for what percentage do you perform primary HPV testing?** (Select one answer for each age group.)

|                 | 0%                       | 1 – 25%                  | 26 – 50%                 | 51 – 75%                 | 76 – 100%                |
|-----------------|--------------------------|--------------------------|--------------------------|--------------------------|--------------------------|
| For women ages: |                          |                          |                          |                          |                          |
| <21 years       | <input type="checkbox"/> | <input type="checkbox"/> | <input type="checkbox"/> | <input type="checkbox"/> | <input type="checkbox"/> |
| 21-29 years     | <input type="checkbox"/> | <input type="checkbox"/> | <input type="checkbox"/> | <input type="checkbox"/> | <input type="checkbox"/> |
| 30-65 years     | <input type="checkbox"/> | <input type="checkbox"/> | <input type="checkbox"/> | <input type="checkbox"/> | <input type="checkbox"/> |
| >65 years       | <input type="checkbox"/> | <input type="checkbox"/> | <input type="checkbox"/> | <input type="checkbox"/> | <input type="checkbox"/> |

**B7. For routine cervical cancer screening in each age group, which of the following approaches do you regularly recommend in your practice?**

(Select one answer for each age group.)

|                 | Pap alone every year     | Pap alone every 3 years  | Pap & HPV co-testing every year | Pap & HPV co-testing every 3 years | Pap & HPV co-testing every 5 years | I do not perform cervical cancer screening for these women |
|-----------------|--------------------------|--------------------------|---------------------------------|------------------------------------|------------------------------------|------------------------------------------------------------|
| For women ages: |                          |                          |                                 |                                    |                                    |                                                            |
| <21 years       | <input type="checkbox"/> | <input type="checkbox"/> | <input type="checkbox"/>        | <input type="checkbox"/>           | <input type="checkbox"/>           | <input type="checkbox"/>                                   |
| 21-29 years     | <input type="checkbox"/> | <input type="checkbox"/> | <input type="checkbox"/>        | <input type="checkbox"/>           | <input type="checkbox"/>           | <input type="checkbox"/>                                   |
| 30-65 years     | <input type="checkbox"/> | <input type="checkbox"/> | <input type="checkbox"/>        | <input type="checkbox"/>           | <input type="checkbox"/>           | <input type="checkbox"/>                                   |
| >65 years       | <input type="checkbox"/> | <input type="checkbox"/> | <input type="checkbox"/>        | <input type="checkbox"/>           | <input type="checkbox"/>           | <input type="checkbox"/>                                   |

**B8. If primary HPV testing becomes available in your practice, how often would you recommend it as a screening option for women in each of these age groups?** (Select one answer for each age group.)

|                 | Every year               | Every 3 years            | Every 5 years            | I would not recommend for these women | I am not sure            |
|-----------------|--------------------------|--------------------------|--------------------------|---------------------------------------|--------------------------|
| For women ages: |                          |                          |                          |                                       |                          |
| <21 years       | <input type="checkbox"/> | <input type="checkbox"/> | <input type="checkbox"/> | <input type="checkbox"/>              | <input type="checkbox"/> |
| 21-29 years     | <input type="checkbox"/> | <input type="checkbox"/> | <input type="checkbox"/> | <input type="checkbox"/>              | <input type="checkbox"/> |
| 30-65 years     | <input type="checkbox"/> | <input type="checkbox"/> | <input type="checkbox"/> | <input type="checkbox"/>              | <input type="checkbox"/> |
| >65 years       | <input type="checkbox"/> | <input type="checkbox"/> | <input type="checkbox"/> | <input type="checkbox"/>              | <input type="checkbox"/> |

**H1.** Do you work full time or part time? Please include all of your work activities (e.g., research, administration), not just clinical activities.

- Full time
- Part time

**H2.** What is your degree or certification?

- Physician (MD or DO)
- Nurse Practitioner or Nurse Midwife
- Physician Assistant

Other      If other, please specify: \_\_\_\_\_

**H3.** What is your specialty?

- Family Medicine
- General Internal Medicine
- Obstetrics and Gynecology
- Gynecology Oncology

Other      If other, please specify: \_\_\_\_\_

**H4.** What is your current employment arrangement?

- Employed by a hospital
- Employed by a health plan
- Employed by a medical group
- Practice owner/partner/associate

Other      If other, please specify: \_\_\_\_\_

**H5.** What is your gender identity?

- Woman
- Man
- Non-binary
- Prefer to self-describe as:
- Prefer not to answer

**H6.** What is your age?

- Less than 30 years old
- 30-39 years old
- 40-49 years old
- 50-59 years old
- 60-69 years old
- 70 years old or older
- Prefer not to state

**H7.** Do you practice in or have an affiliation with an academic medical center?

- Yes
- No

**H8.** How long have you worked in your current practice?

- Less than a year
- 1 year to less than 3 years
- 3 years to less than 5 years
- 5 years to less than 10 years
- 10 years or more

**H9.** How many physicians are at the main clinic where you practice?

- 1-10
- 11-30
- 31-50
- 51 or more

Supplementary Table 1. Characteristics of providers who responded and were eligible for the survey and those who were either ineligible or did not complete the survey, overall and by healthcare system

| Provider Characteristics <sup>1,2</sup> | KPWA<br>n=414    |                  | MGB<br>n=503     |                  | PH/UTSW<br>n=186 |                  | Total<br>n=1,103 |                  |
|-----------------------------------------|------------------|------------------|------------------|------------------|------------------|------------------|------------------|------------------|
| Eligible and responded to survey?       | Yes              | No               | Yes              | No               | Yes              | No               | Yes              | No               |
|                                         | n=200<br>(48.3%) | n=214<br>(51.7%) | n=223<br>(44.3%) | n=280<br>(55.7%) | n=69<br>(37.1%)  | n=117<br>(62.9%) | N=492<br>(44.6%) | N=611<br>(55.4%) |
|                                         | n (%)            | n (%)            | n (%)            | n (%)            | n (%)            | n (%)            | n (%)            | n (%)            |
| <b>Age (years)</b>                      |                  |                  |                  |                  |                  |                  |                  |                  |
| < 40                                    | 89 (45.6)        | 101 (47.2)       | 51 (23.2)        | 57 (21.8)        | 21 (31.3)        | 33 (28.2)        | 161 (33.4)       | 191 (32.3)       |
| 41-49                                   | 59 (30.3)        | 43 (20.1)        | 54 (24.6)        | 70 (26.8)        | 18 (26.9)        | 33 (28.2)        | 131 (27.2)       | 146 (24.7)       |
| 50-59                                   | 26 (13.3)        | 39 (18.2)        | 71 (32.3)        | 75 (28.7)        | 18 (26.9)        | 24 (20.5)        | 115 (23.9)       | 138 (23.3)       |
| 60+                                     | 21 (10.8)        | 31 (14.5)        | 44 (20.0)        | 59 (22.6)        | 10 (14.9)        | 27 (23.1)        | 75 (15.6)        | 117 (19.8)       |
| Prefer Not to State / Unknown           | 5                | 0                | 3                | 19               | 2                | 0                | 10               | 19               |
| <b>Gender Identity</b>                  |                  |                  |                  |                  |                  |                  |                  |                  |
| Women                                   | 154 (79.4)       | 164 (76.6)       | 193 (88.5)       | 219 (78.2)       | 61 (89.7)        | 97 (82.9)        | 408 (89.7)       | 480 (78.6)       |
| Men                                     | 40 (20.6)        | 50 (23.4)        | 25 (11.5)        | 61 (21.8)        | 7 (10.3)         | 20 (17.1)        | 72 (10.3)        | 131 (21.4)       |
| Other / Unknown                         | 6                | 0                | 5                | 0                | 1                | 0                | 12               | 0                |
| <b>Provider Type</b>                    |                  |                  |                  |                  |                  |                  |                  |                  |
| Physician                               | 143 (71.5)       | 163 (76.2)       | 184 (82.5)       | 252 (90.0)       | 20 (29.0)        | 68 (58.1)        | 347 (70.5)       | 483 (79.1)       |
| Nurse Practitioner / Nurse Midwife      | 27 (13.5)        | 9 (4.2)          | 24 (10.8)        | 9 (3.2)          | 49 (71.0)        | 49 (41.9)        | 100 (20.3)       | 67 (11.0)        |
| Physician's Assistant                   | 30 (15.0)        | 42 (19.6)        | 15 (6.7)         | 19 (6.8)         | 0 (0.0)          | 0 (0.0)          | 45 (9.1)         | 61 (10.0)        |
| <b>Provider Specialty</b>               |                  |                  |                  |                  |                  |                  |                  |                  |
| Family Medicine                         | 147 (73.5)       | 167 (78.0)       | 21 (9.9)         | 14 (5.0)         | 28 (40.6)        | 35 (29.9)        | 197 (40.0)       | 216 (35.4)       |
| General Internal Medicine               | 12 (6.0)         | 22 (10.3)        | 156 (69.5)       | 147 (52.5)       | 2 (2.9)          | 19 (16.2)        | 169 (34.4)       | 188 (30.8)       |
| Ob/gyn / Gyn onc                        | 41 (20.5)        | 25 (11.7)        | 46 (20.6)        | 119 (42.5)       | 39 (56.5)        | 63 (53.9)        | 126 (25.6)       | 207 (33.9)       |
| <b>Years in Current Practice</b>        |                  |                  |                  |                  |                  |                  |                  |                  |
| < 3                                     | 62 (31.0)        | 74 (34.6)        | 27 (12.3)        | 49 (19.9)        | 19 (27.9)        | 105 (90.5)       | 108 (22.1)       | 228 (39.6)       |
| 3- < 5                                  | 34 (17.0)        | 18 (8.4)         | 28 (12.7)        | 33 (13.4)        | 10 (14.7)        | 3 (2.6)          | 72 (14.8)        | 54 (9.4)         |
| 5- < 10                                 | 43 (21.5)        | 38 (17.8)        | 45 (20.5)        | 39 (15.9)        | 17 (25.0)        | 2 (1.7)          | 105 (21.5)       | 79 (13.7)        |
| ≥ 10                                    | 61 (30.5)        | 84 (39.3)        | 120 (54.6)       | 125 (50.8)       | 22 (32.4)        | 6 (5.2)          | 203 (41.6)       | 215 (37.3)       |
| Unknown                                 | 0                | 0                | 3                | 34               | 1                | 1                | 4                | 35               |



Abbreviations: KPWA, Kaiser Permanente Washington; MGB, Mass General Brigham; PH/UTSW, Parkland Health – University of Texas Southwestern Medical Center; Ob/gyn, obstetrics and gynecology; and Gyn onc, gynecology oncology.

<sup>1</sup>Providers eligible for the survey at each healthcare system included those who performed a minimum of 10 cervical cancer screening tests during 2019, had a designated specialty of general internal medicine, family medicine, or obstetrics/gynecology, and were physicians, physician assistants, certified nurse midwives, or nurse practitioners. Note that more providers were eligible to receive the survey than the survey was ultimately sent to due to contact restrictions at sites, which led to the higher response rate noted in the Methods.

<sup>2</sup> Employment status, number of physicians in practice, and the typical number of female patient office visits per week were not available for these providers. Providers that completed the survey performed more Pap tests in 2019 than providers that did not complete the survey (median [IQR] patients tested in 2019 for KPWA, 57 [33,89] vs. 41.5 [22, 88]; MGB, 53 [29, 109] vs. 40.5 [19, 82.5]; PH/UTSW 131 [25, 429] vs. 67 [24, 182]; and overall, 57 [30, 105] vs. 44 [21, 95]).
